# Supplementary material for: Mo-doping heterojunction: interfacial engineering in an efficient electrocatalyst for superior simulated seawater hydrogen evolution
Source: Royal Society of Chemistry journal article supplement (doi:10.1039/d3sc05220f), 2023-12-06
Supplement: d3sc05220f1.pdf [file d3sc05220f1.pdf]

## Electronic Supplementary Information

### Mo-doping heterojunction: interfacial engineering in an efficient electrocatalyst toward superior simulated seawater hydrogen evolution

Zuo-Ming He<sup>† a,b</sup>, Chun-Xiao Zhang<sup>† d</sup>, Si-Qi Guo<sup>† e</sup>, Peng Xu<sup>a</sup>, Yuan Ji<sup>a</sup>, Si-Wei Luo<sup>a</sup>, Xiang Qi<sup>a</sup>, Yun-Dan Liu<sup>\*a</sup>, Ning-Yan Cheng<sup>\*e</sup>, Shi-Xue Dou<sup>f</sup>, Yun-Xiao Wang<sup>\*f,g</sup>, Bin-Wei Zhang<sup>\*b,c</sup>

<sup>a</sup> Hunan Key Laboratory of Micro-Nano Energy Materials and Devices, Xiangtan University; Xiangtan 411105, P. R. China

E-mail: [liuyd@xtu.edu.cn](mailto:liuyd@xtu.edu.cn)

<sup>b</sup> School of Chemistry and Chemical Engineering, Chongqing University, Chongqing 400044, P. R. China E-mail: [binwei@cqu.edu.cn](mailto:binwei@cqu.edu.cn)

<sup>c</sup> Center of Advanced Electrochemical Energy, Institute of Advanced Interdisciplinary Studies, Chongqing 400044, P. R. China

<sup>d</sup> School of Physics and Optoelectronic Engineering, Shandong University of Technology, Zibo 255000, P. R. China

<sup>e</sup> Materials and Intelligent Sensing Laboratory of Anhui Province, Key Laboratory of Structure and Functional Regulation of Hybrid Materials of Ministry of Education, Institutes of Physical Science and Information Technology, Anhui University, Hefei 230601, P. R. China

E-mail: [ningyancheng@ahu.edu.cn](mailto:ningyancheng@ahu.edu.cn)

<sup>f</sup> Institute of Energy Materials Science (IEMS), University of Shanghai For Science and Technology, 516 Jungong Road, Shanghai, 200093, China

<sup>g</sup> Institute for Superconducting and Electronic Materials, Australian Institute of Innovative Materials, University of Wollongong, Innovation Campus, Squires Way, North Wollongong, New South Wales 2500, Australia

E-mail: [yunxiao@uow.edu.cn](mailto:yunxiao@uow.edu.cn)

<sup>†</sup>. These authors contributed equally: Z. M. He, C. X. Zhang, S. Q. Guo

## **1. Experimental Procedures**

### **1.1. Materials.**

Carbon cloth was provided by a commercial supplier (CeTech Co., Ltd), and  $\text{Ni}(\text{CH}_3\text{COO})_2 \cdot 4\text{H}_2\text{O}$ , ammonium molybdate tetrahydrate,  $\text{CO}(\text{NH}_2)_2$ ,  $\text{NaBH}_4$ ,  $\text{Na}_2\text{MoO}_4 \cdot 2\text{H}_2\text{O}$ , and selenium powder were purchased from Aladdin Co., Inc. 20 wt.% Pt/C and 5 wt. % Nafion were purchased from Sigma–Aldrich. All the other reagents were analytical grade and used in the synthesis process as received without further purification.

### **1.2. Characterization.**

X-ray diffraction (XRD) patterns were recorded on a Rigaku D/Max 2500V instrument with  $\text{Cu K}\alpha$  radiation in the  $2\theta$  range of  $10\text{--}80^\circ$ . The morphology of the samples was investigated by scanning electron microscopy (SEM, JEOLJSM-6360). Scanning transmission electron microscopy (STEM) images and energy-dispersive X-ray spectroscopy (EDS) data were acquired on a JEOL NEOARM200F microscope equipped with a spherical aberration (Cs) probe corrector at 200 kV. X-ray photoelectron spectroscopy (XPS) was conducted on a Kratos Analytical Ltd instrument with a  $\text{Cu K}\alpha$  source. Raman spectra were recorded on an WITec Raman microscope with an excitation laser wavelength of 532 nm.

### **1.3. Electrochemical measurement**

Electrochemical measurements were conducted on an electrochemical work station (CHI660D) with a typical three-electrode electrochemical cell consisting of a reference electrode (a Hg/HgO electrode), a counter electrode (carbon rod), and the working electrode. For electrochemical tests in alkaline high-purity water, a 1 M KOH solution was used as the electrolyte. For the electrochemical tests in alkaline simulated seawater, a mixture solution containing 1 M KOH and 0.5 M NaCl were used as electrolyte.

Before the test, the catalyst was subjected to CV at a scan rate of 50 mV/s to stabilize and activate the it. The electro-catalytic HER properties were measured using linear sweep voltammetry (LSV) at a scan rate of 2 mV/s. All of the LSV curves have been corrected for IR compensation. Electrochemical impedance spectroscopy (EIS) was performed at an overpotential of 250 mV vs. RHE in the frequency range  $10^{-1}\text{--}10^5$  Hz. To estimate the electrochemical surface area,  $C_{dl}$  values were obtained by scanning CVs in the non-ohmic potential range of 0.0254~0.125 V vs. RHE with scan rates from 20 to 180 mV/s.

#### 1.4. Computational details

First-principles calculations were performed using the Vienna Ab initio Simulation Package (VASP) based on density functional theory (DFT)<sup>1-3</sup>. Both structural relaxation and static self-consistency calculations employed the generalized gradient approximation (GGA) with Perdew-Burke-Ernzerhof (PBE)<sup>4</sup>. The interaction of ions with electrons was ascribed by projector-augmented wave potentials (PAWs)<sup>5</sup>. The cutoff energy was set to 500 eV. The convergence precision for energy and force was set at  $10^{-5}$  eV and  $0.01$  eV  $\text{\AA}^{-1}$  per atom, respectively. A dipole correction was applied for the entire calculation because of the asymmetry in the vertical direction<sup>6,7</sup>. A six-layer-thick of NiSe supercell (96 atoms) was used to simulate the surface reactions, and a vertical vacuum layer of over  $20$   $\text{\AA}$  was set to separate the neighboring layers.

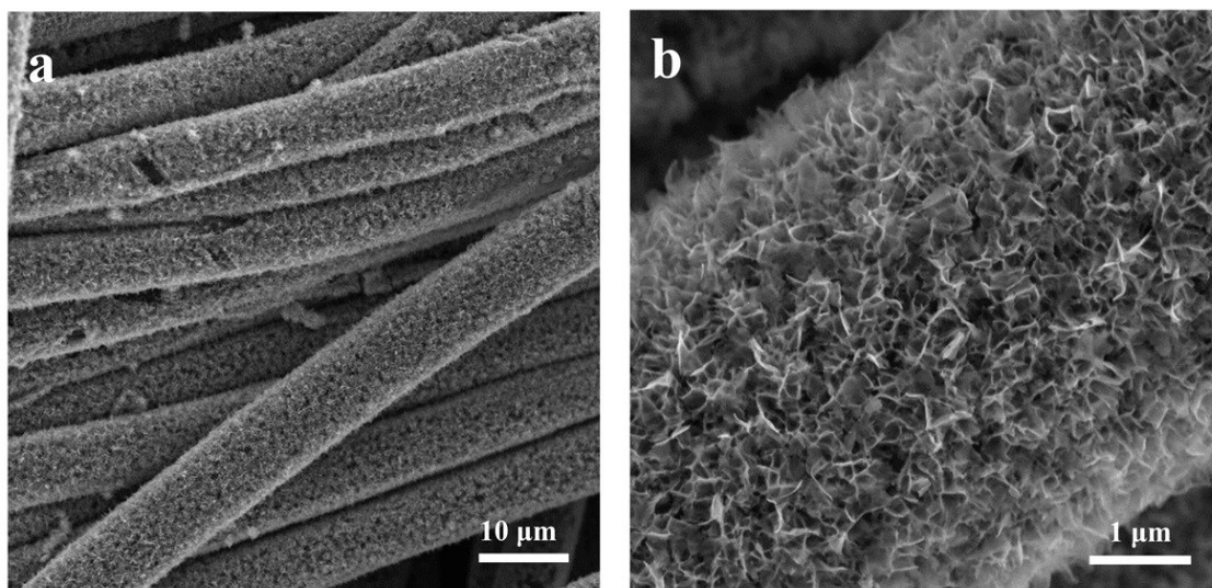

**Figure S1.** SEM images of NiMoO<sub>4</sub> on CC.

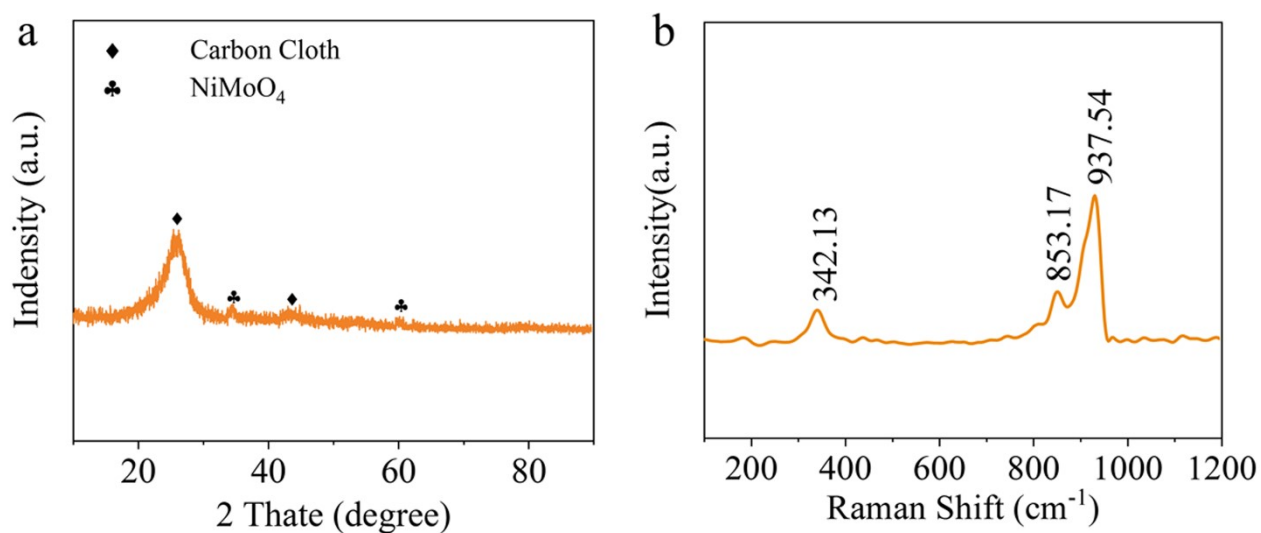

**Figure S2.** XRD pattern and Raman spectrum of NiMoO<sub>4</sub> precursor.

There is no obvious characteristic peak of the NiMoO<sub>4</sub> precursor in the XRD pattern, indicating its low crystallinity.

The Raman spectra show the peaks at 342.13, 853.17 and 937.54 cm<sup>-1</sup>, which may correspond to the bending mode of Mo–O, the stretching vibrations of the bridging Mo–O–M bonds (M=Ni or Mo) and Mo=O bonds of NiMoO<sub>4</sub>, respectively.

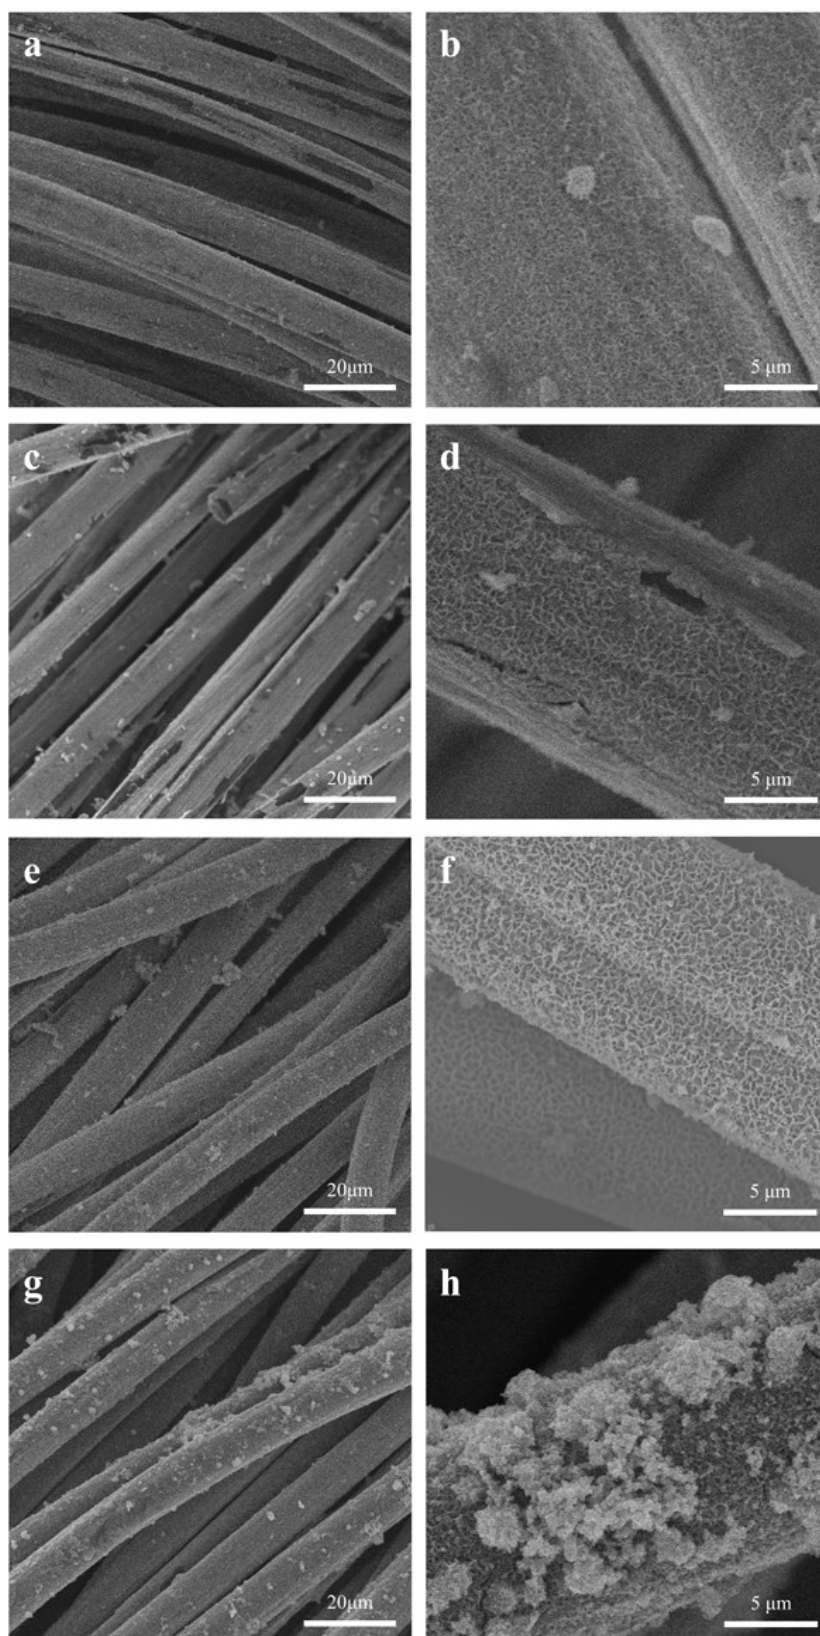

**Figure S3.** SEM images of (a-b)  $\text{Mo}_x\text{-Ni}_{0.85}\text{Se}/\text{MoSe}_2\text{-10}$ , (c-d)  $\text{Mo}_x\text{-Ni}_{0.85}\text{Se}/\text{MoSe}_2\text{-30}$ , (e-f)  $\text{Mo}_x\text{-Ni}_{0.85}\text{Se}/\text{MoSe}_2$ , (g-h)  $\text{Mo}_x\text{-Ni}_{0.85}\text{Se}/\text{MoSe}_2\text{-90}$ .

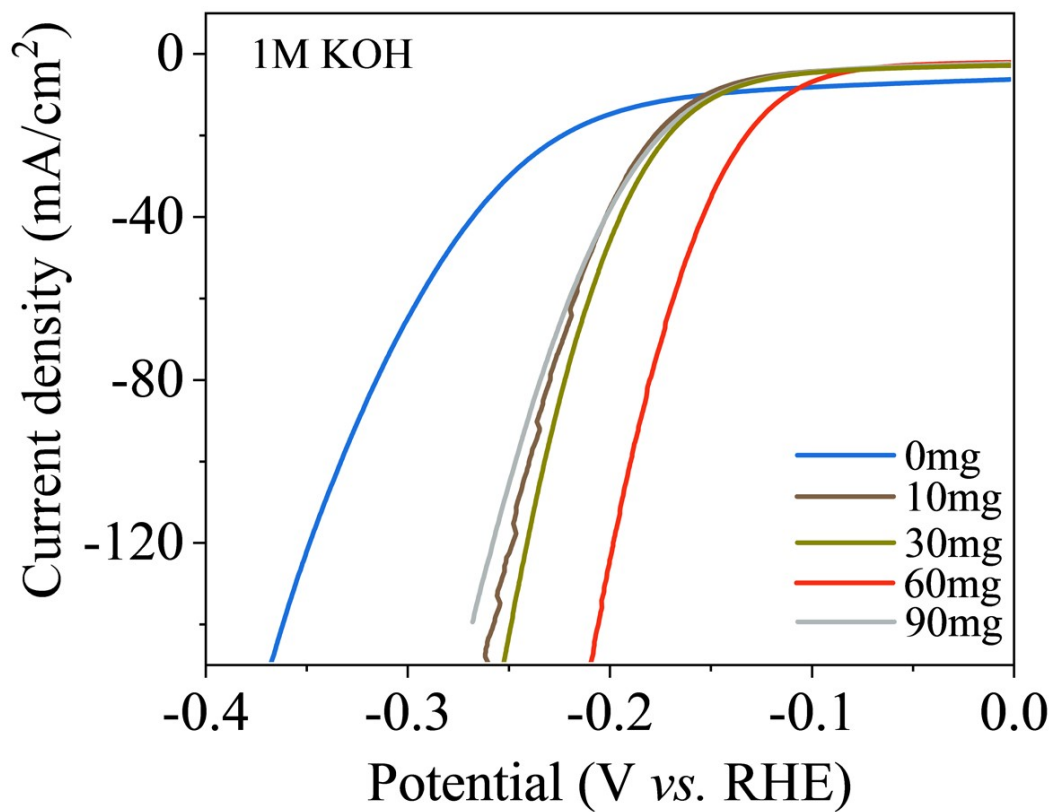

**Figure S4.** The HER polarization curves of a series of  $\text{Mo}_x\text{-Ni}_{0.85}\text{Se/MoSe}_2$ , which were prepared with different amounts of  $\text{NaMoO}_4 \cdot 2\text{H}_2\text{O}$ , in 1 M KOH solution.

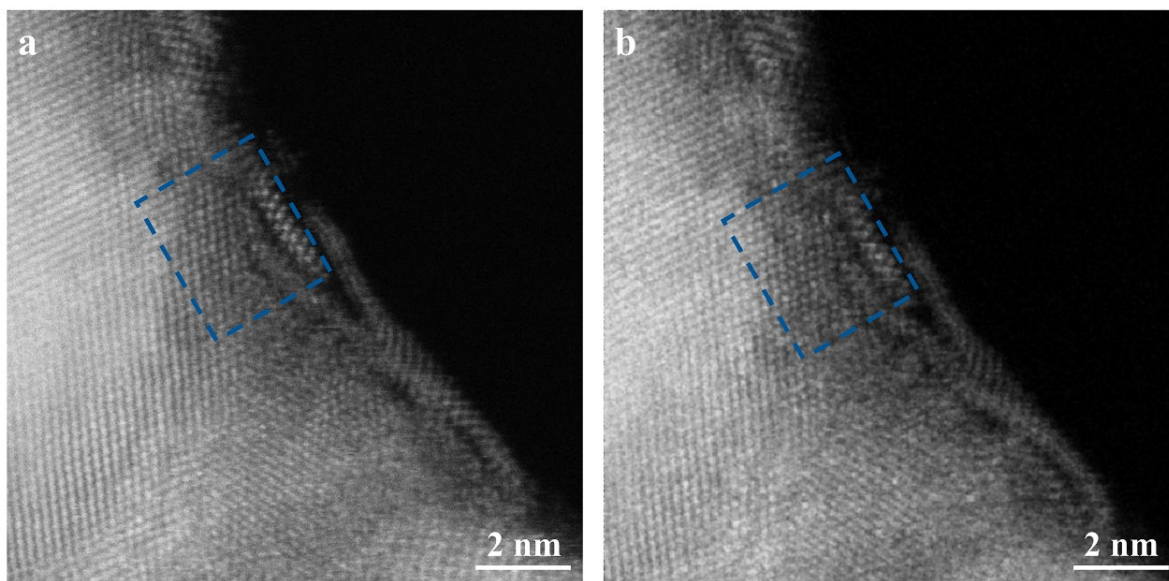

**Figure S5.** HAADF-STEM images of Mo<sub>x</sub>-Ni<sub>0.85</sub>Se/MoSe<sub>2</sub> with different defocus in the same area.

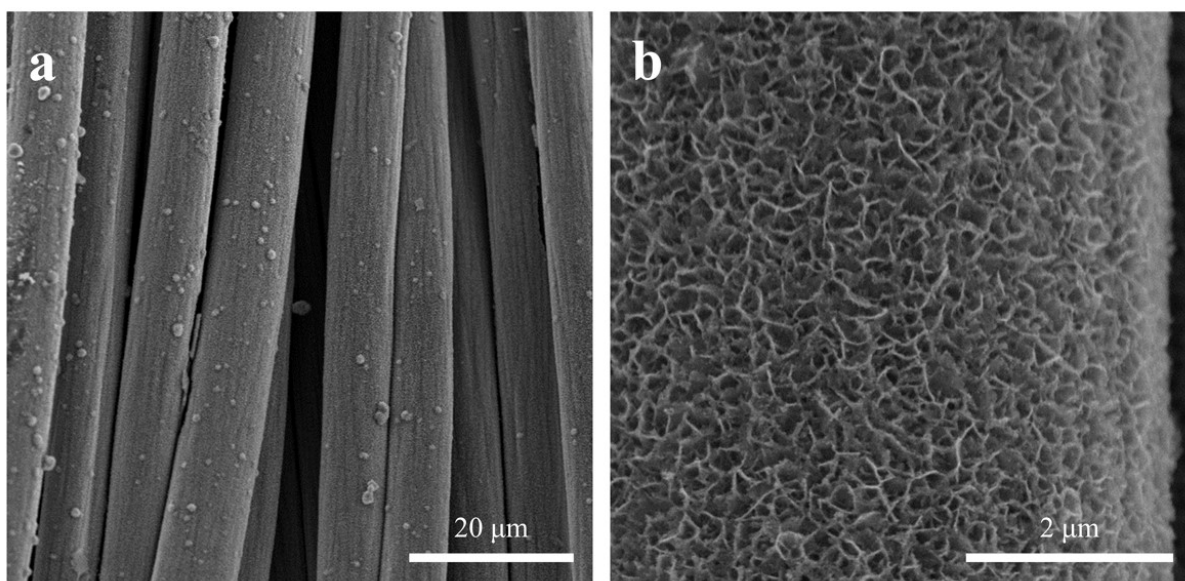

**Figure S6.** SEM images of NiSe<sub>2</sub> on CC.

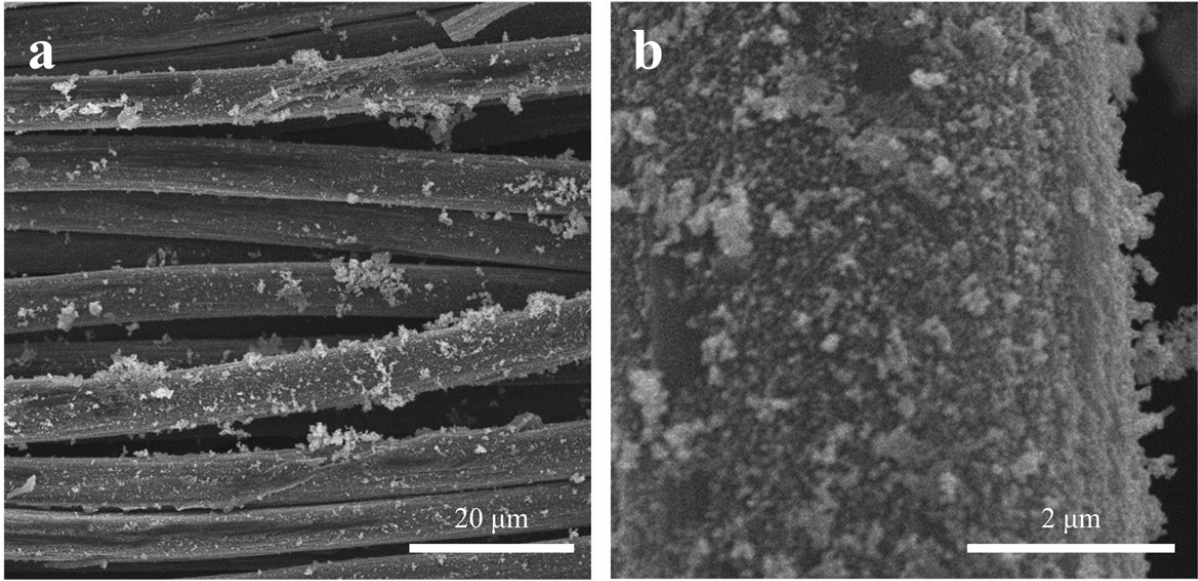

**Figure S7.** SEM images of MoSe<sub>2</sub> on CC.



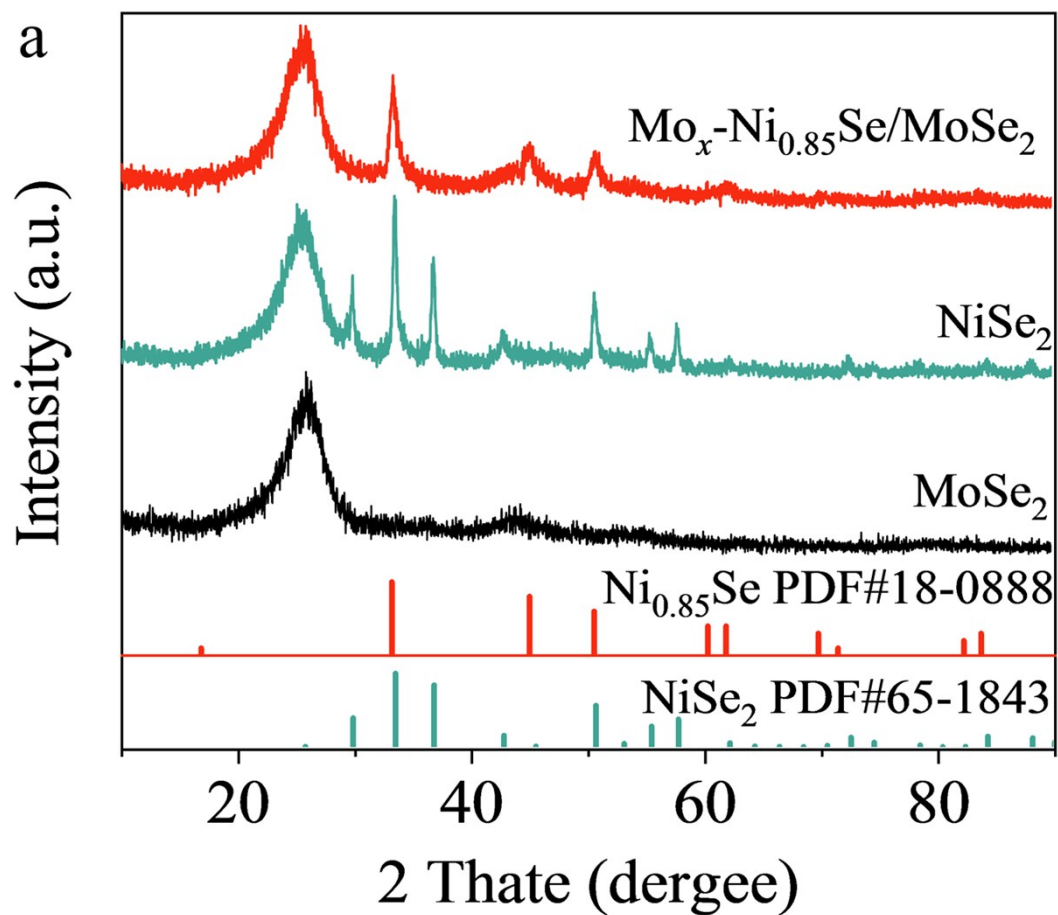

**Figure S8.** XRD patterns of  $\text{Mo}_x\text{-Ni}_{0.85}\text{Se/MoSe}_2$ ,  $\text{MoSe}_2$ , and  $\text{NiSe}_2$ . It should be noted that the two distinct peaks sitting around  $26^\circ$  and  $43^\circ$  originate from the carbon cloth substrate.

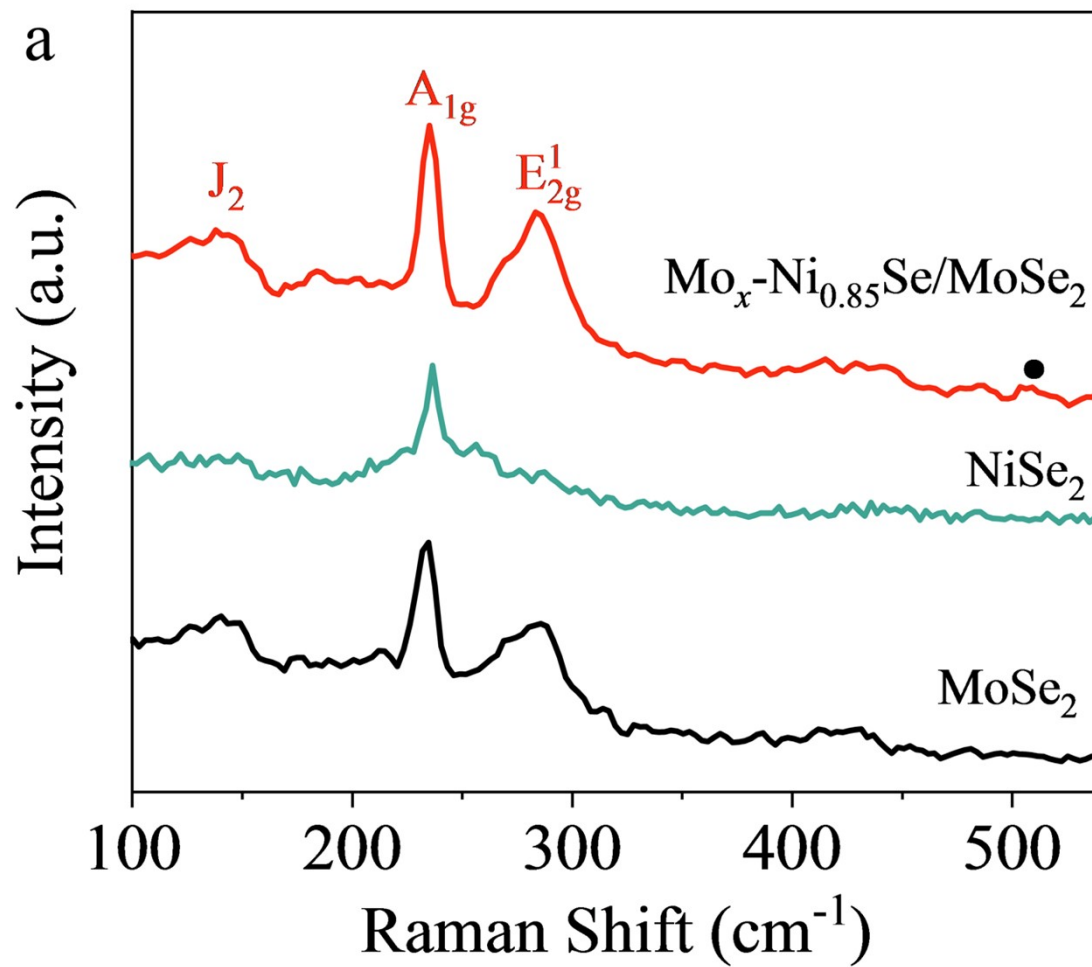

**Figure S9.** Raman spectra of  $Mo_x-Ni_{0.85}Se/MoSe_2$ ,  $MoSe_2$ , and  $NiSe_2$ .

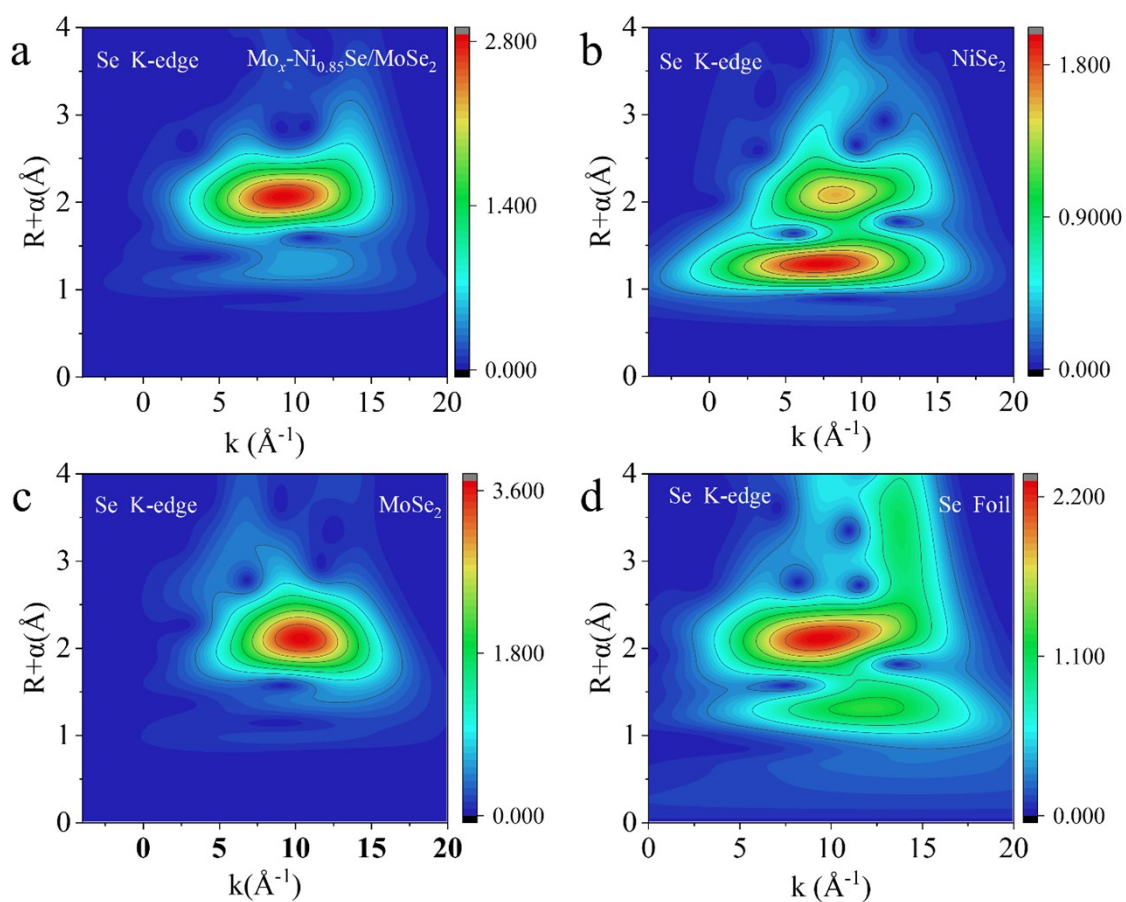

**Figure S10.** Wavelet transform of Se K-edge EXAFS for  $\text{Mo}_x\text{-Ni}_{0.85}\text{Se}/\text{MoSe}_2$ ,  $\text{NiSe}_2$ ,  $\text{MoSe}_2$ , and Ni Foil. The Se wavelet transform-EXAFS indicates the Ni-Se coordination in  $\text{Mo}_x\text{-Ni}_{0.85}\text{Se}/\text{MoSe}_2$  shares a similar coordination environment to that of  $\text{NiSe}_2$  and  $\text{MoSe}_2$ .

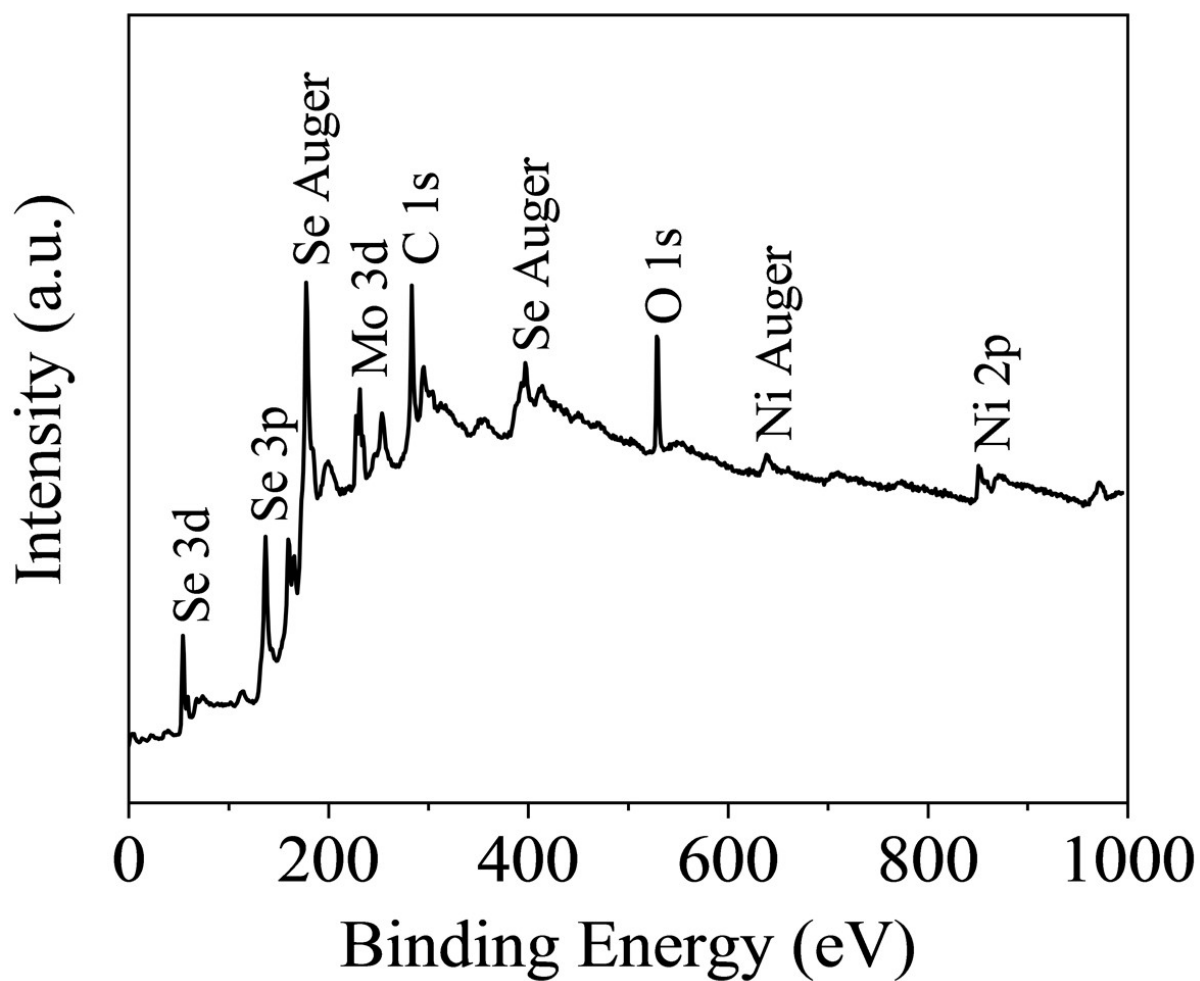

**Figure S11.** The XPS survey spectrum of  $\text{Mo}_x\text{-Ni}_{0.85}\text{Se}/\text{MoSe}_2$ .

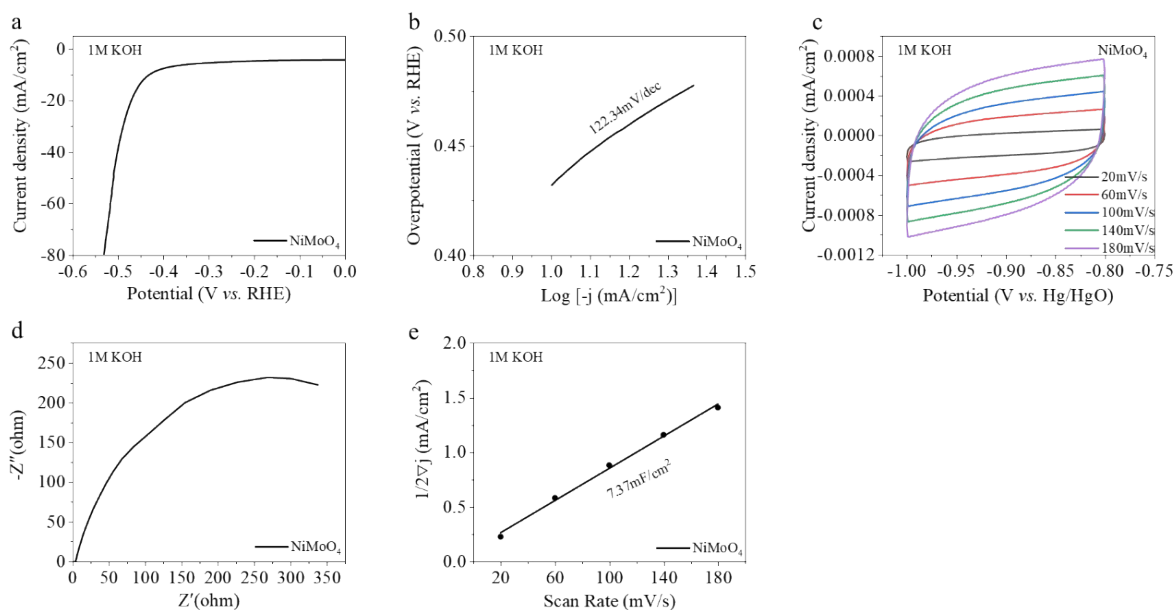

**Figure S12.** (a) The LSV curve, (b) the Tafel slope curve, (c) CV curves with different scan rates, (d) the EIS curve, and (e) the capacitive currents at -0.5 V vs. RHE as a function of scan rate for NiMoO<sub>4</sub> in 1 M KOH.

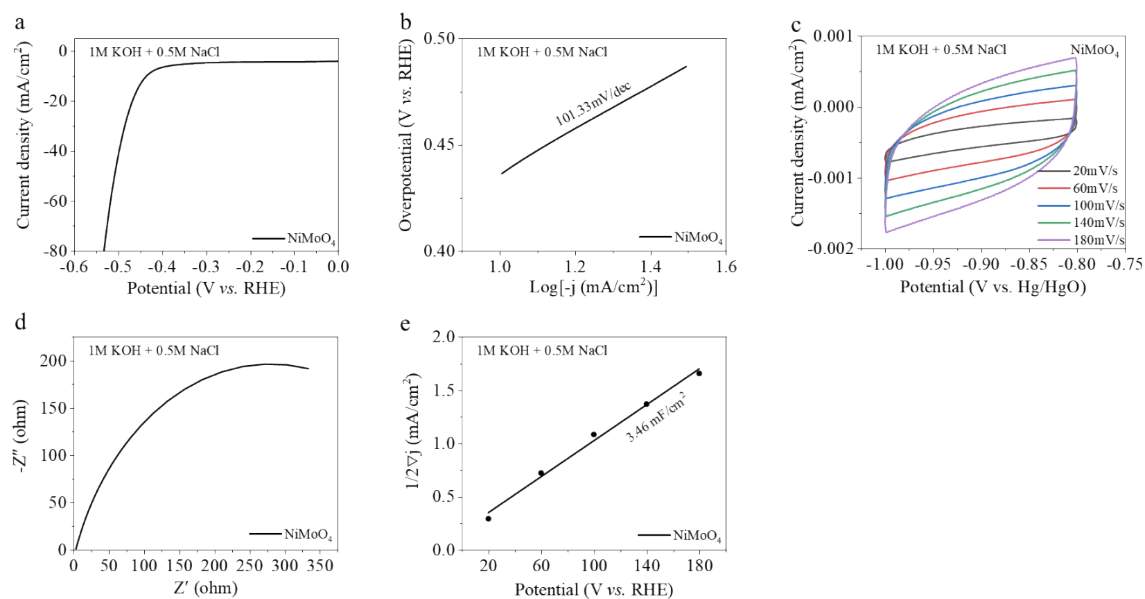

**Figure S13.** (a) The LSV curve, (b) Tafel slope curve, (c) CV curves with different scan rates, and (d) EIS curve of NiMoO<sub>4</sub> in simulated alkaline seawater. (e) Capacitive currents at -0.5 V vs. RHE as a function of scan rate for NiMoO<sub>4</sub> in simulated alkaline seawater.

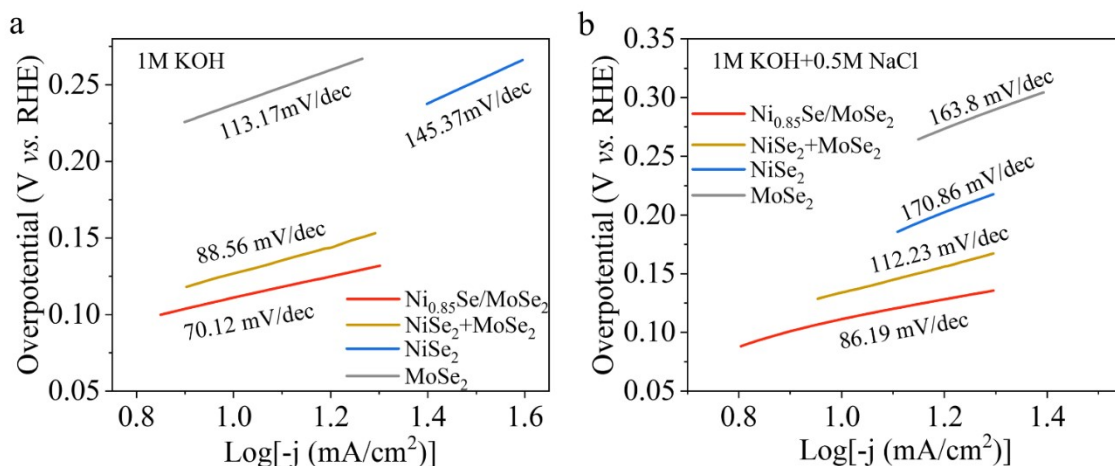

**Figure S14.** Tafel slopes of Mo<sub>x</sub>-Ni<sub>0.85</sub>Se/MoSe<sub>2</sub>, NiSe<sub>2</sub>+MoSe<sub>2</sub>, NiSe<sub>2</sub>, and MoSe<sub>2</sub> in (a) 1 M KOH and (b) in alkaline simulated seawater (1 M KOH + 0.5 M NaCl), respectively.

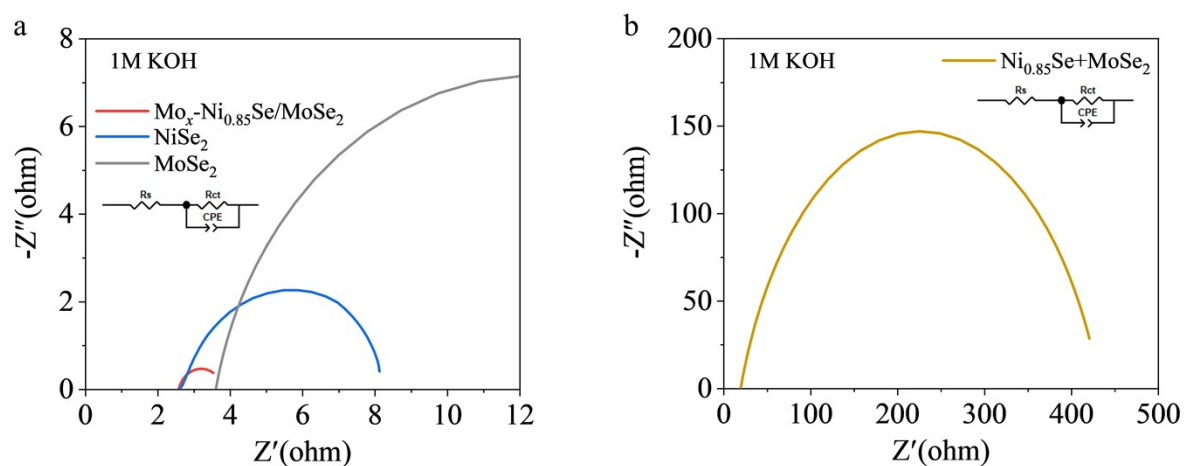

**Figure S15.** (a) The EIS curve (with inset equivalent circuit) of Mo<sub>x</sub>-Ni<sub>0.85</sub>Se/MoSe<sub>2</sub>, NiSe<sub>2</sub>, MoSe<sub>2</sub> and (b) physical mixed sample in 1 M KOH.

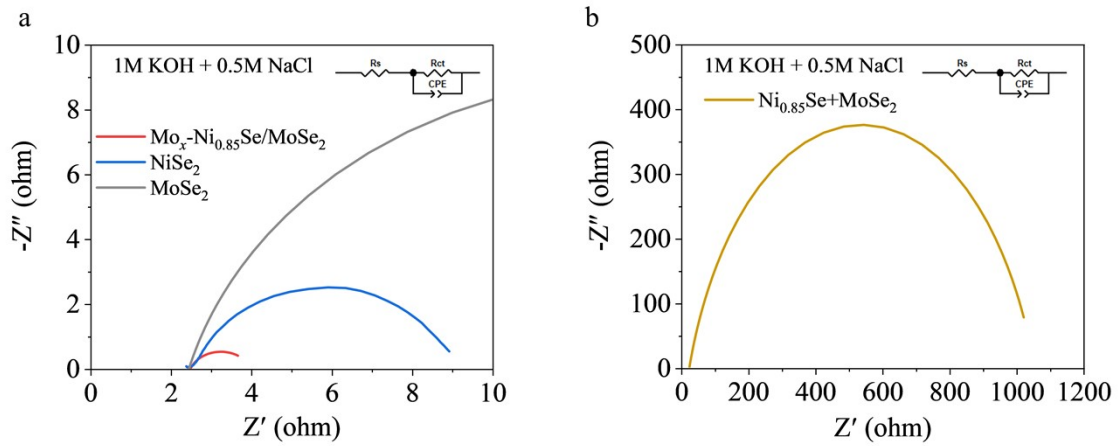

**Figure S16.** (a) The EIS curve (with inset equivalent circuit) of  $\text{Mo}_x\text{-Ni}_{0.85}\text{Se}/\text{MoSe}_2$ ,  $\text{NiSe}_2$ ,  $\text{MoSe}_2$  and (b) physical mixed sample in alkaline simulated seawater.

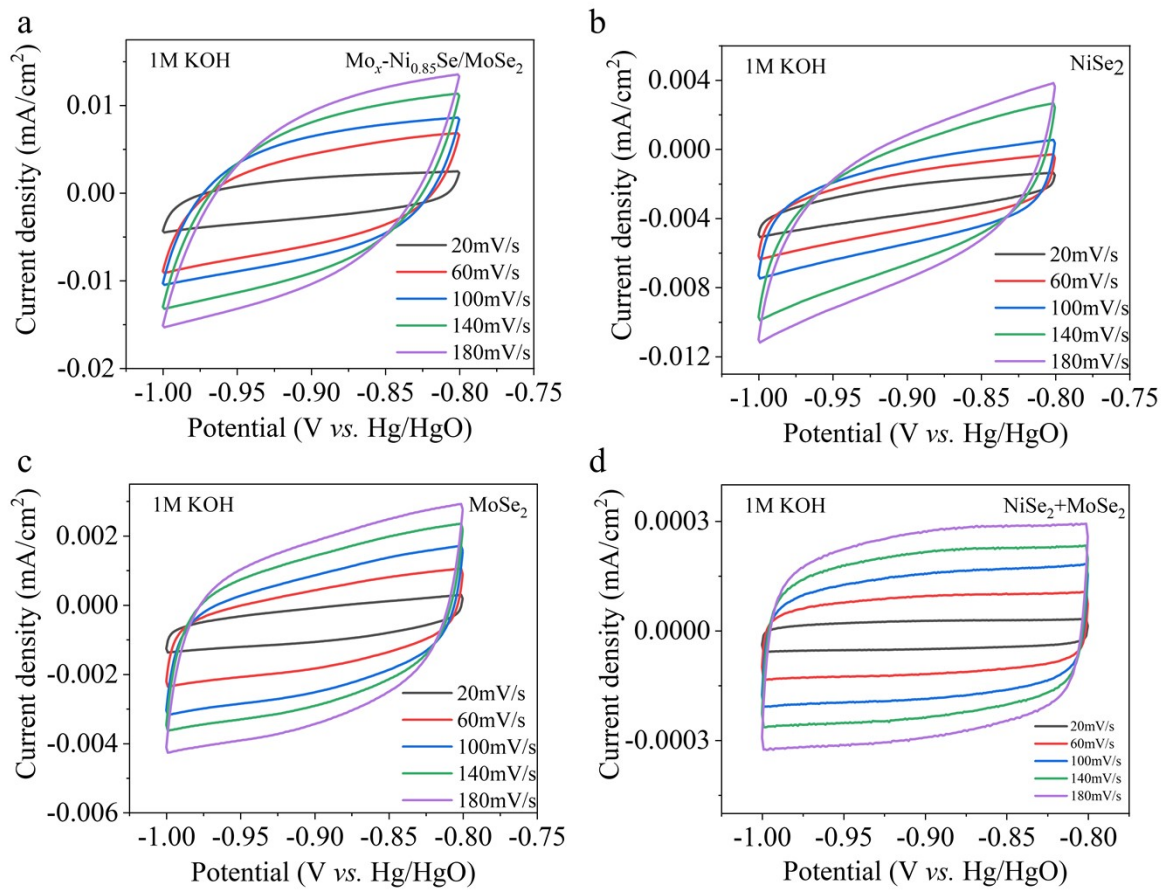

**Figure S17.** The CV curve of (a)  $\text{Mo}_x\text{-Ni}_{0.85}\text{Se}/\text{MoSe}_2$ , (b)  $\text{NiSe}_2$ , (c)  $\text{MoSe}_2$ , (d)  $\text{NiSe}_2+\text{MoSe}_2$  in 1 M KOH.

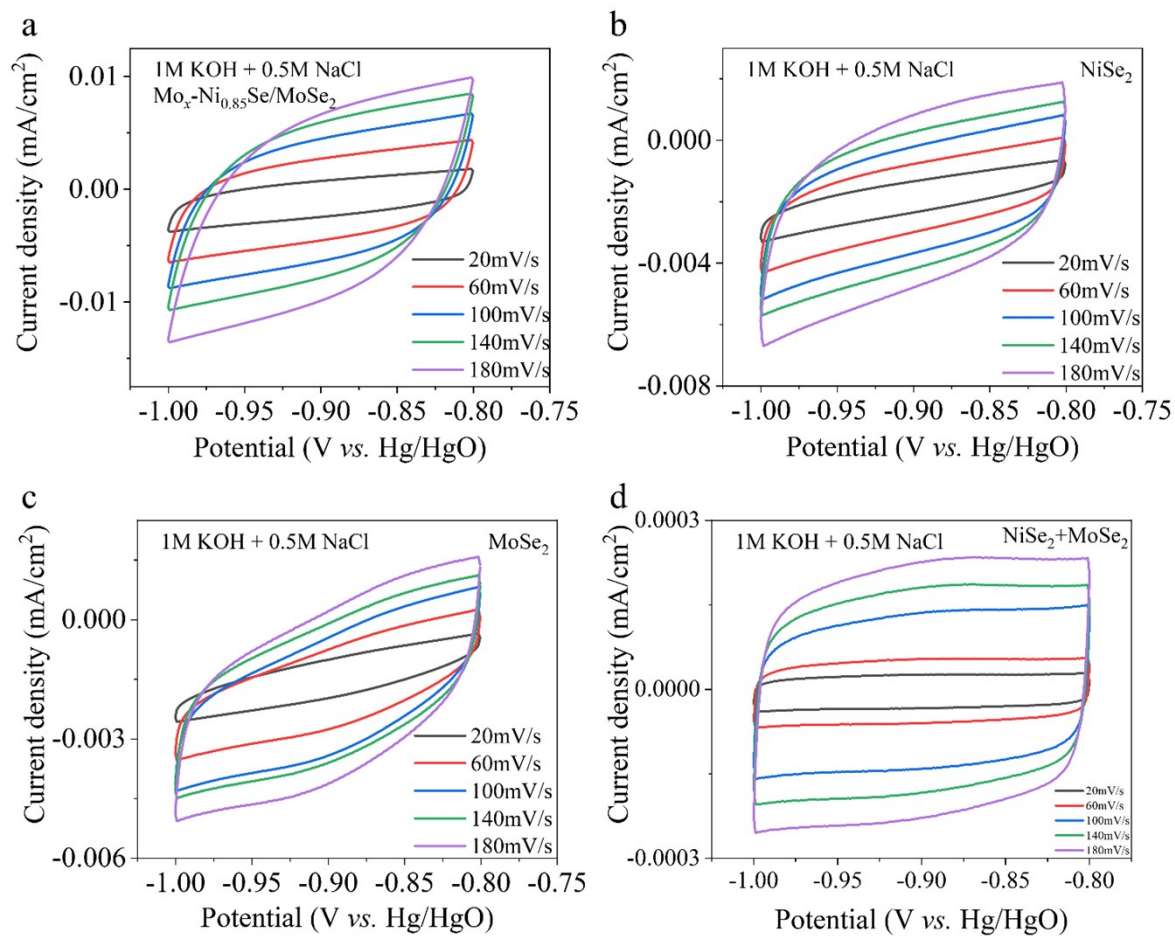

**Figure S18.** The CV curve of (a)  $\text{Mo}_x\text{-Ni}_{0.85}\text{Se}/\text{MoSe}_2$ , (b)  $\text{NiSe}_2$ , (c)  $\text{MoSe}_2$ , (d)  $\text{NiSe}_2+\text{MoSe}_2$  in alkaline simulated seawater.



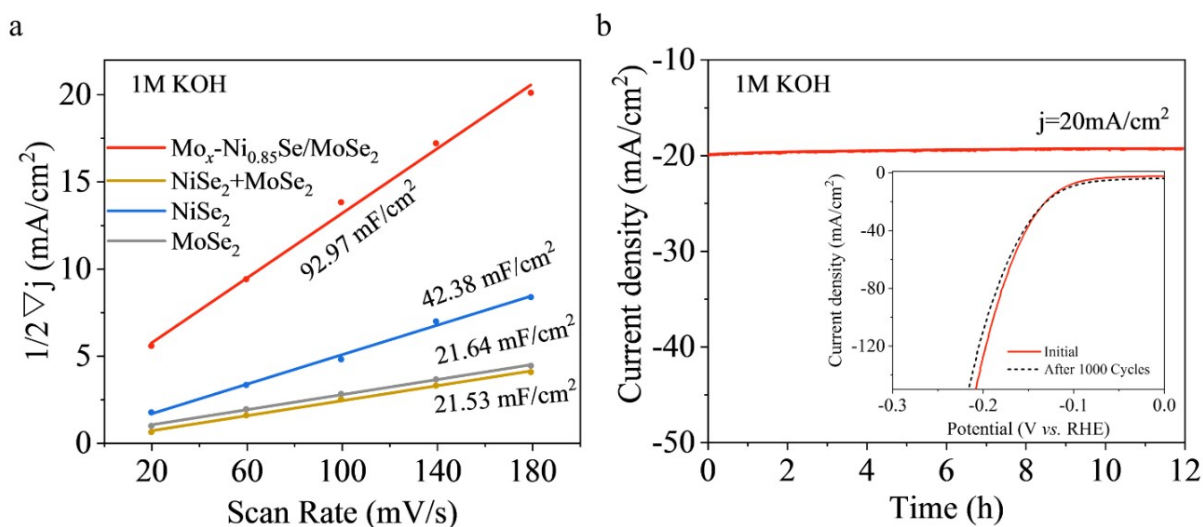

**Figure S19.** (a) Electrochemically active surface area (ECSA) and versus double-layer capacitance (Cdl), (b) Chronopotentiometry test of Mo<sub>x</sub>-Ni<sub>0.85</sub>Se/MoSe<sub>2</sub> catalyst at 20 mA /cm<sup>2</sup> for 12 h (inset: LSV curves before and after 1000 cycles of CV ) in 1 M KOH.

The durability test results of Mo<sub>x</sub>-Ni<sub>0.85</sub>Se/MoSe<sub>2</sub> (Supplementary Figure 19b) reveal that it exhibits superior electrochemical stability as it can stably run 12 h at 20 mA/cm<sup>2</sup> in 1 M KOH with negligible current density drop.

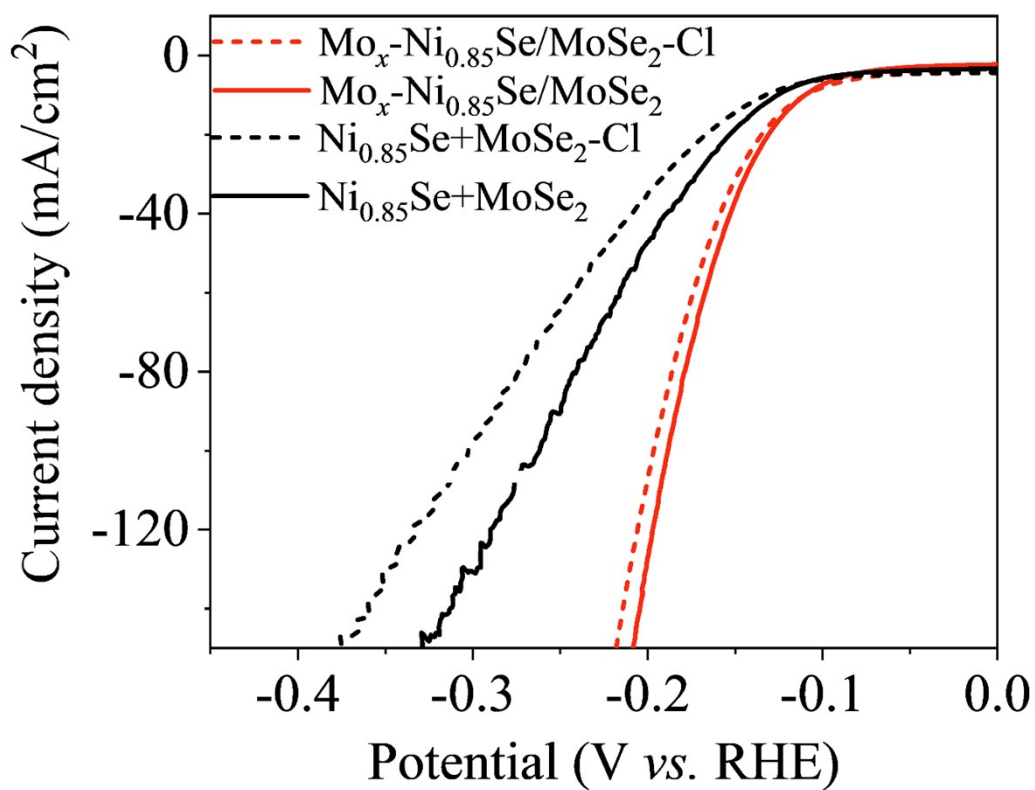

**Figure S20.** Polarization curves of Mo<sub>x</sub>-Ni<sub>0.85</sub>Se/MoSe<sub>2</sub> and Physical mixed sample (marked as Ni<sub>0.85</sub>Se+MoSe<sub>2</sub>) in 1 M KOH and alkaline simulated seawater (Cl representative in alkaline simulated seawater).

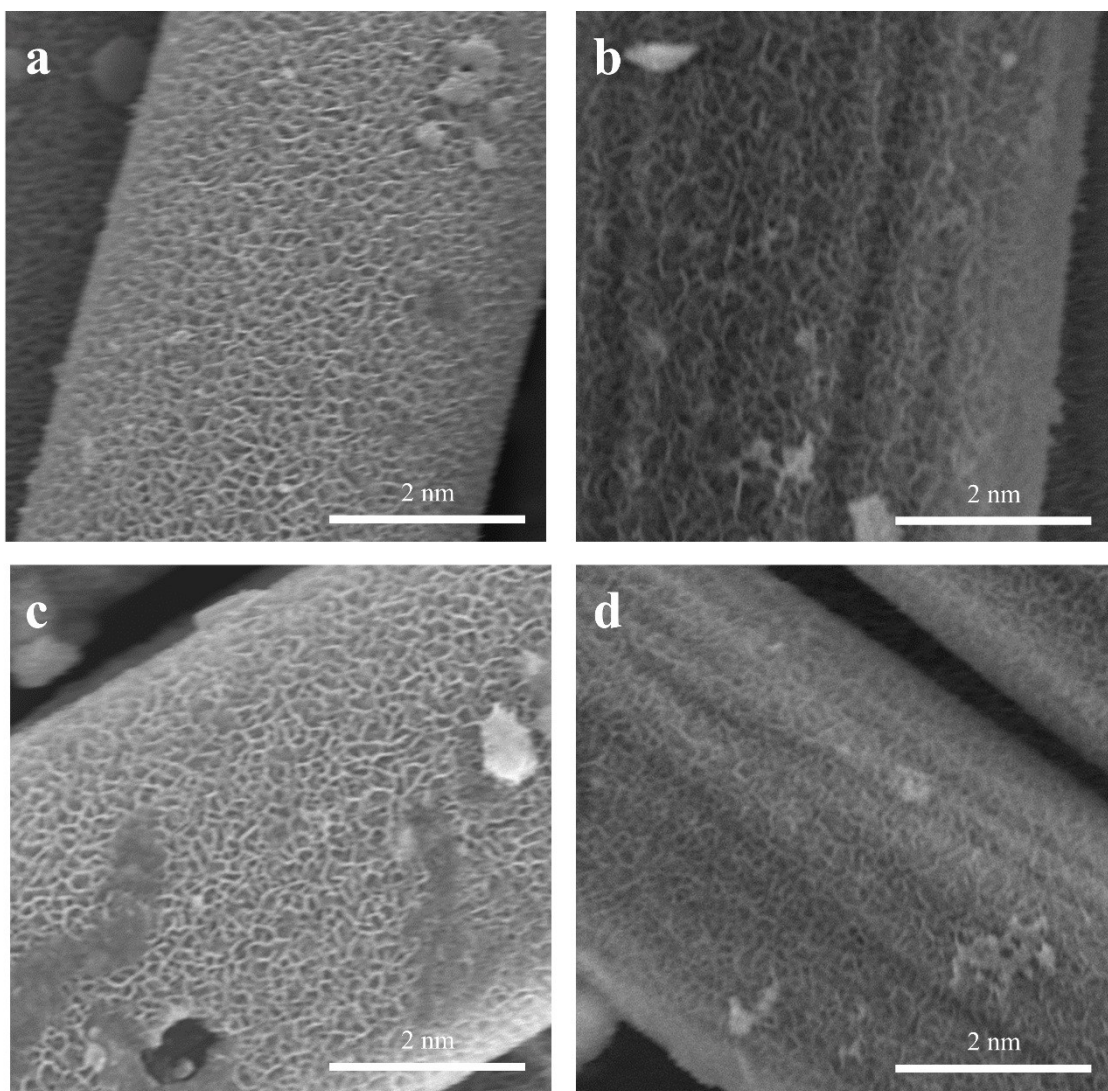

**Figure S21.** SEM images of  $\text{Mo}_x\text{-Ni}_{0.85}\text{Se/MoSe}_2$  acquired after (a),(b) 1000 CV cycles and 12 h time-overpotential test in 1 M KOH, and (c),(d) 1000 CV cycles and 80 h time-overpotential test in the alkaline simulated water, respectively.

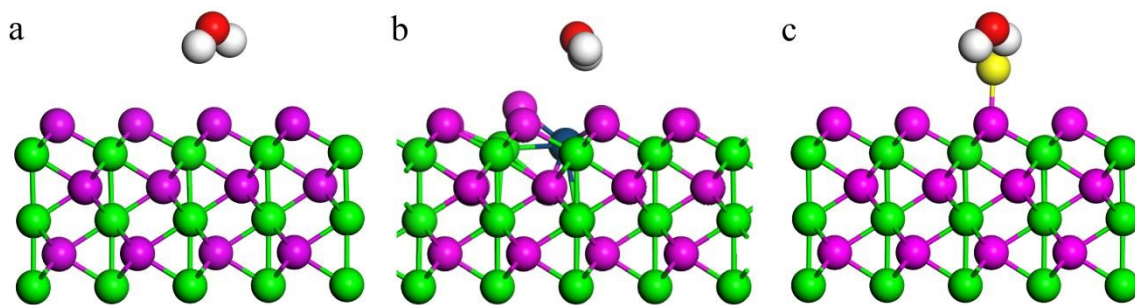

**Figure S22.** Schematic diagram for H<sub>2</sub>O absorption on the NiSe, Mo-NiSe, and NiSe+Cl, respectively.

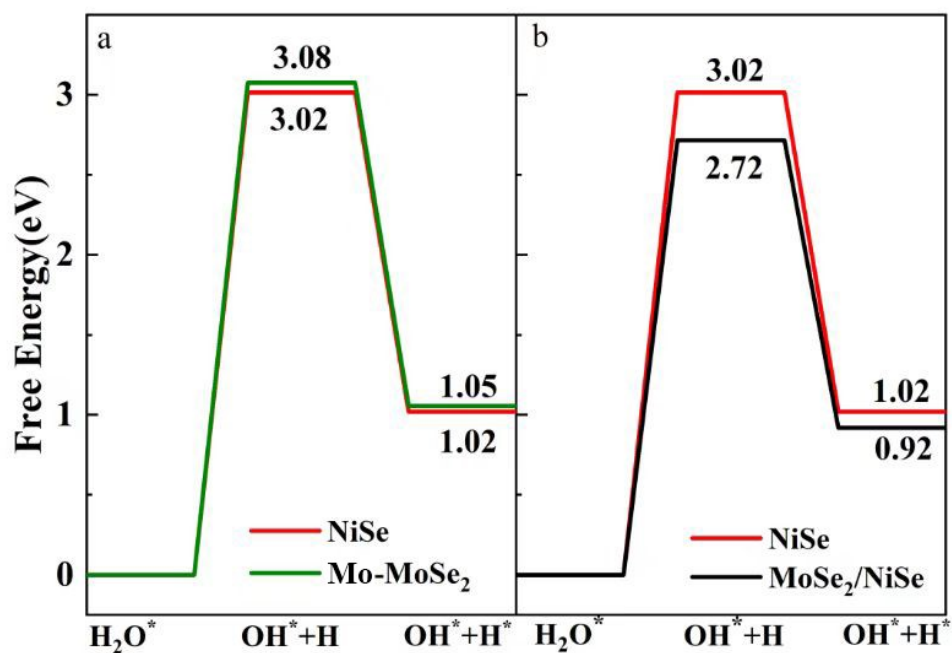

**Figure S23.** Energy barriers of water decomposition on NiSe, Mo-NiSe, and MoSe<sub>2</sub>/NiSe. The H<sub>2</sub>O\*, OH\*+H, and OH\*+H\* represent the initial state, transition state, and final state, respectively. The “\*” refers to the chemical group absorbing on the catalyst surface.

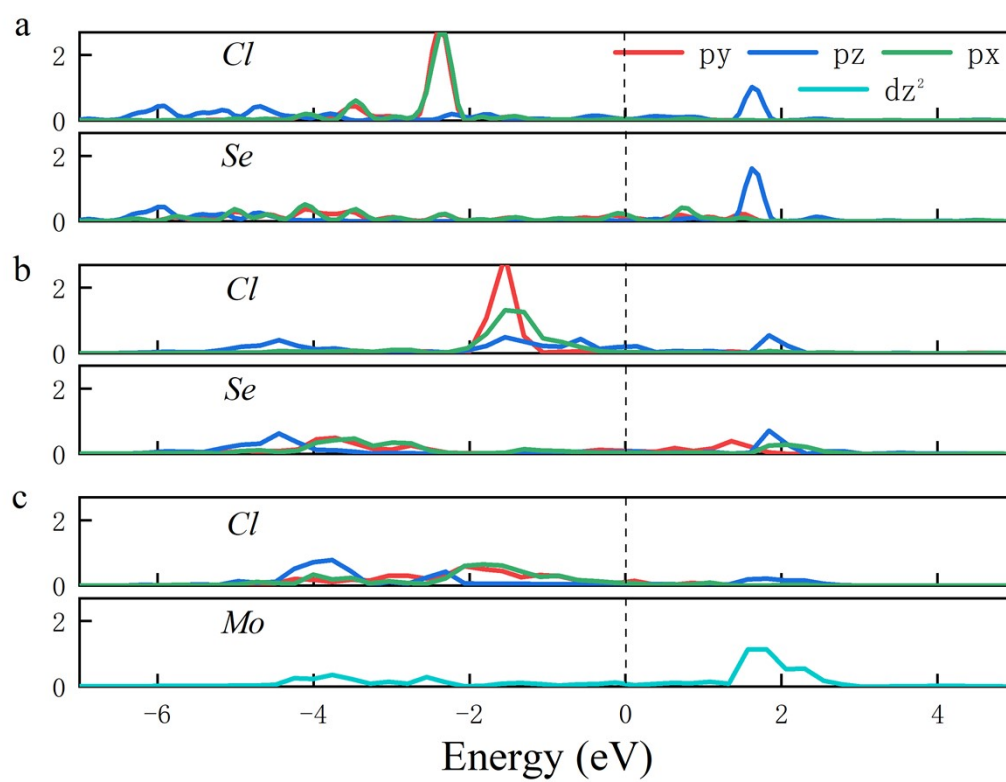

**Figure S24.** PDOS of Cl adatom and its bonding atom in (a) NiSe+Cl, (b) Mo-NiSe+Cl<sub>1</sub>, and (c) Mo-NiSe+Cl<sub>2</sub>.

**Table S1.** The comparison HER performance with reported works.

| catalyst                                                   | Overpotential<br>( $\eta_{10}$ /mV) | Tafel slope<br>(mV/dec) | $C_{dl}$<br>(mF/cm <sup>2</sup> ) | Stability<br>(h) | electrolyte                 | Reference        |
|------------------------------------------------------------|-------------------------------------|-------------------------|-----------------------------------|------------------|-----------------------------|------------------|
| <b>Mo<sub>x</sub>-Ni<sub>0.85</sub>Se/MoSe<sub>2</sub></b> | <b>110 mV</b>                       | <b>70.12 mV/dec</b>     | <b>92.97 mF/cm<sup>2</sup></b>    | <b>12 h</b>      | <b>1 M KOH</b>              | <b>This work</b> |
| P-NiSe <sub>2</sub> /MoSe <sub>2</sub> (1-1)@CC            | 175 mV                              | 78 mV/dec               | 14.5 mF/cm <sup>2</sup>           | 20 h             | 1 M KOH                     | 8                |
| Ni <sub>0.85</sub> Se/Ni <sub>3</sub> S <sub>2</sub>       | 145 mV                              | 130 mV/dec              | 36.8 mF/cm <sup>2</sup>           | 20 h             | 1 M KOH                     | 9                |
| NF@Mo-Ni <sub>0.85</sub> Se                                | 130 mV                              | 98.98 mV/dec            | 63.86 mF/cm <sup>2</sup>          | 12 h             | 1 M KOH                     | 10               |
| 1T-MoSe <sub>2</sub> /NiSe NS/NW                           | 120 mV                              | 86 mV/dec               | 21.2 mF/cm <sup>2</sup>           | 10 h             | 1 M KOH                     | 11               |
| Ni(OH) <sub>2</sub> -MoSe <sub>2</sub>                     | 130 mV                              | 78.2 mV/dec             | 32.3 mF/cm <sup>2</sup>           | 36 h             | 1 M KOH                     | 12               |
| CoSe <sub>2</sub> -MoSe <sub>2</sub> (1-1)/rGO             | 182 mV                              | 89 mV/dec               | 14.0 mF/cm <sup>2</sup>           | 15 h             | 1 M KOH                     | 13               |
| Mo@(2H-1T)-MoSe <sub>2</sub>                               | 244 mV( $\eta_{20}$ )               | 80 mV/dec               | 91.5 m/ cm <sup>2</sup>           | 12h              | 1 M KOH                     | 14               |
| MoSe <sub>2</sub> /CoSe hollow spheres                     | 165 mV                              | 82 mV/dec               | 78.6 mF/cm <sup>2</sup>           | 20h              | 1 M KOH                     | 15               |
| NiSe <sub>2</sub> /Ni <sub>3</sub> Se <sub>4</sub> /NF-4   | 145 mV                              | 69.7 mV/dec             | 4.4 mF/cm <sup>2</sup>            | CV2000           | 1 M KOH                     | 16               |
| <b>Mo<sub>x</sub>-Ni<sub>0.85</sub>Se/MoSe<sub>2</sub></b> | <b>110 mV</b>                       | <b>86.19 mv/dec</b>     | <b>83.07 mF/cm<sup>2</sup></b>    | <b>80 h</b>      | <b>1 M KOH + 0.5 M NaCl</b> | <b>This work</b> |
| oct_Cu <sub>2</sub> O/NF                                   | 237 mV( $\eta_{20}$ )               | 90 mv/dec               | --                                | 20 h             | 1 M KOH + 0.5 M NaCl        | 17               |
| (Co,Fe)PO <sub>4</sub>                                     | 134 mV                              | --                      | --                                | --               | 1 M KOH + 0.5M NaCl         | 18               |
| Ti@NiB-1.5 h                                               | 149 mV                              | 118 mV/dec              | 89.7 mF/cm <sup>2</sup>           | 28 h             | 1 M KOH + 0.5 M NaCl        | 19               |
| NiFe LDH/FeOOH                                             | 181.8 mV                            | --                      | --                                | --               | 1 M KOH + 0.5 M NaCl        | 20               |
| CoFeZr/NF                                                  | 159 mV                              | 132.7 mV/dec            | --                                | 35 h             | 1 M KOH + 0.5 M NaCl        | 21               |
| GO@Fe@Ni-Co@NF                                             | 150 mV                              | --                      | --                                | --               | 1 M KOH + 0.5 M NaCl        | 22               |
| Ni <sub>3</sub> S <sub>2</sub> @Ni foam                    | 109 mV                              | 52 mV/dec               | 7.1 mF/cm <sup>2</sup>            | 50 h             | 1 M KOH + 0.5 M NaCl        | 23               |
| NiFe-PBA-gel-cal                                           | 480 mV( $\eta_{100}$ )              | 160.8 mV/dec            | --                                | 60 h             | 1 M KOH +                   | 24               |

|                                                    |                         |              |                              |        |                         |    |
|----------------------------------------------------|-------------------------|--------------|------------------------------|--------|-------------------------|----|
|                                                    |                         |              |                              |        | 0.5 M NaCl              |    |
| NiCoP/NiCo-LDH                                     | 213 mV( $\eta_{50}$ )   | 65 mV/dec    | --                           | --     | 1 M KOH +<br>0.5M NaCl  | 25 |
| HCl-c-NiFe                                         | 175 mV( $\eta_{100}$ )  | --           | --                           | 300 h  | 1 M KOH +<br>0.5 M NaCl | 26 |
| NiMoN@NiFeN                                        | 82 mV( $\eta_{100}$ )   | --           | --                           | 48 h   | 1 M KOH +<br>0.5 M NaCl | 27 |
| CoSe/MoSe <sub>2</sub>                             | 164 mV                  | --           | --                           | 38 h   | 1 M KOH +<br>0.5 M NaCl | 28 |
| NiP <sub>x</sub> @HA                               | 52 mV                   | 83.76 mV/dec | 68.35 mF/cm <sup>2</sup>     | 960 h  | 1 M KOH +<br>0.5 M NaCl | 29 |
| (C-Co <sub>2</sub> P)                              | 192 mV( $\eta_{1000}$ ) | --           | --                           | 60 h   | 1 M KOH +<br>0.5 M NaCl | 30 |
| Ti/TiO <sub>2</sub> @NiB <sub>x</sub>              | 91 mV                   | 135.6mV/dec  | 3.62mF/cm <sup>2</sup>       | 72 h   | 1 M KOH +<br>0.5 M NaCl | 31 |
| Ru <sub>2</sub> P@Ru/CNT                           | 27 mV                   | --           | --                           | 250 h  | 1 M KOH +<br>0.5 M NaCl | 32 |
| NiFeSP-NT                                          | 146 mV                  |              | 107.3 mF/cm <sup>2</sup>     | 1000 h | 1 M KOH +<br>0.5 M NaCl | 33 |
| Ni <sub>3</sub> Bi <sub>2</sub> S <sub>2</sub> @NF | 157 mV( $\eta_{100}$ )  | --           | --                           | 12 h   | 1 M KOH +<br>0.5 M NaCl | 34 |
| NiPS/NF                                            | 177 mV( $\eta_{100}$ )  | --           | --                           | 60 h   | 1 M KOH +<br>0.5 M NaCl | 35 |
| FeNiP-NPHC                                         | 180 mV( $\eta_{100}$ )  | 101 mV/dec   | --                           | 100 h  | 1 M KOH +<br>0.5 M NaCl | 36 |
| S,P-<br>(Ni,Mo,Fe)OOH/NiMo<br>P/wood aerogel       | 187 mV( $\eta_{50}$ )   | --           | --                           | 30 h   | 1 M KOH +<br>0.5 M NaCl | 37 |
| FeP@CoP/NF                                         | 205 mV( $\eta_{100}$ )  | --           | --                           | 100 h  | 1 M KOH +<br>0.5 M NaCl | 38 |
| S-NiMoO <sub>4</sub> @NiFe-<br>LDH NS              | 220 mV( $\eta_{100}$ )  | 69 mV/dec    | 148.56<br>mF/cm <sup>2</sup> | 20 h   | 1 M KOH +<br>0.5 M NaCl | 39 |
| Co-Fe <sub>2</sub> P                               | 221 mV( $\eta_{100}$ )  | --           | --                           | 20 h   | 1 M KOH +<br>0.5 M NaCl | 40 |
| Cu <sub>3</sub> P-FeP@CC                           | 178 mV                  | 76.8 mV/dec  | --                           | 5 h    | 1 M KOH +<br>0.5 M NaCl | 41 |
| Ni <sub>3</sub> N/Co <sub>4</sub> N                | 282 mV                  | 95 mV/dec    | --                           | 14 h   | 1 M KOH +<br>0.5 M NaCl | 42 |

|                                              |                        |                  |                          |       |                     |    |
|----------------------------------------------|------------------------|------------------|--------------------------|-------|---------------------|----|
| Ni-MoN                                       | 29 mV                  | 36.8 mV/dec      | --                       | 200 h | 1 M KOH<br>seawater | 43 |
| MnCo/NiSe/NF                                 | 31.4 mV                | 58.24 mV/dec     | --                       | 200 h | 1 M KOH<br>seawater | 44 |
| 1D-Cu@Co-CoO/Rh                              | 137.7 mV               | 124.8 mV/dec     | 4.53 mF/cm <sup>2</sup>  | 20 h  | 1 M KOH<br>seawater | 45 |
| Ni <sub>3</sub> N@C/NF                       | 142 mV( $\eta_{100}$ ) | --               | --                       | 100 h | 1 M KOH<br>seawater | 46 |
| Ni-SN@C                                      | 23 mV                  | --               | --                       | 40 h  | 1 M KOH<br>seawater | 47 |
| O-POCs                                       | 197 mV                 | 67.6 mV/dec      | --                       | 20 h  | 1 M KOH<br>seawater | 48 |
| Co-N,P-HCS                                   | 287 mV( $\eta_{100}$ ) | 109 mV/dec       | --                       | 100 h | 1 M KOH<br>seawater | 49 |
| Cu <sub>2</sub> S thin films                 | 358 mV( $\eta_{100}$ ) | 128 mV/dec       | --                       | 12 h  | 1 M KOH<br>seawater | 50 |
| Ni-SA/NC                                     | 290 mV( $\eta_{100}$ ) | 123 mV/dec       | --                       | 14 h  | 1 M KOH<br>seawater | 51 |
| Mn-doped Ni <sub>2</sub> P/Fe <sub>2</sub> P | 308 mV( $\eta_{100}$ ) | --               | --                       | 200 h | 1 M KOH<br>seawater | 52 |
| CuS                                          | 199 mV                 | 168.14<br>mV/dec | 28.97 mF/cm <sup>2</sup> | 10 h  | 1 M KOH<br>seawater | 53 |
| Ni <sub>2</sub> P-Fe <sub>2</sub> P/NF       | 252 mV( $\eta_{100}$ ) | --               | --                       | 36 h  | 1 M KOH<br>seawater | 54 |
| CoSe <sub>2</sub> -NCF                       | 134 mV                 | 67 mV/dec        | --                       | 50 h  | 1 M KOH<br>seawater | 55 |

---

## Supplementary References



1. G. Kresse and J. Furthmüller, Efficient iterative schemes for ab initio total-energy calculations using a plane-wave basis set, *Phys Rev B Condens Matter*, 1996, **54**, 11169-11186.
2. G. Kresse and J. Hafner, Ab initio molecular dynamics for liquid metals, *Phys Rev B Condens Matter*, 1993, **47**, 558-561.
3. G. Kresse and D. Joubert, From ultrasoft pseudopotentials to the projector augmented-wave method, *Physical review b*, 1999, **59**, 1758.
4. J. P. Perdew, K. Burke and M. Ernzerhof, Generalized gradient approximation made simple, *Physical review letters*, 1996, **77**, 3865.
5. P. E. Blöchl, Projector augmented-wave method, *Physical review B*, 1994, **50**, 17953.
6. L. Bengtsson, Dipole correction for surface supercell calculations, *Physical Review B*, 1999, **59**, 12301.
7. J. Neugebauer and M. Scheffler, Adsorbate-substrate and adsorbate-adsorbate interactions of Na and K adlayers on Al(111), *Phys Rev B Condens Matter*, 1992, **46**, 16067-16080.
8. M. Zhu, Q. Yan, Y. Q. Xue, Y. D. Yan, K. Zhu, K. Ye, J. Yan, D. X. Cao, H. J. Xie and G. L. Wang, Free-standing P-doped NiSe<sub>2</sub>/MoSe<sub>2</sub> catalyst for efficient hydrogen evolution in acidic and alkaline media, *ACS Sustainable Chemistry & Engineering*, 2021, **10**, 279-287.
9. D. D. Shi, L. Q. Wu, Q. Chen, D. Y. Jin, M. Y. Chen, Q. Shan and D. H. Wang, Interface engineering of Ni<sub>0.85</sub>Se/Ni<sub>3</sub>S<sub>2</sub> nanostructure for highly enhanced hydrogen evolution in alkaline solution, *International Journal of Hydrogen Energy*, 2022, **47**, 305-313.
10. C. M. Yang, C. T. Wang, L. H. Zhou, W. Duan, Y. Y. Song, F. C. Zhang, Y. Z. Zhen, J. J. Zhang, W. W. Bao and Y. X. Lu, Refining d-band center in Ni<sub>0.85</sub>Se by Mo doping: A strategy for boosting hydrogen generation via coupling electrocatalytic oxidation 5-hydroxymethylfurfural, *Chemical Engineering Journal*, 2021, **422**, 130125.
11. X. Zhang, Y. Y. Zhang, Y. Zhang, W. J. Jiang, Q. H. Zhang, Y. G. Yang, L. Gu, J. S. Hu and L. J. Wan, Phase-controlled synthesis of 1T-MoSe<sub>2</sub>/NiSe heterostructure nanowire arrays via electronic injection for synergistically enhanced hydrogen evolution, *Small Methods*, 2019, **3**, 1800317.
12. L. M. Zhang, W. F. Zhang, M. L. Wang, H. Wang, J. H. Zang, W. X. Shen, X. W. Huang, D. Z. Kong, Y. T. Tian and T. T. Xu, Interface engineering of nickel Hydroxide-Molybdenum diselenide nanosheet heterostructure arrays for efficient alkaline hydrogen production, *Journal of Colloid and Interface Science*, 2022, **614**, 267-276.
13. M. Zhu, Q. Yan, X. J. Bai, H. Cai, J. Zhao, Y. D. Yan, K. Zhu, K. Ye, J. Yan and D. X. Cao, Construction of reduced graphene oxide coupled with CoSe<sub>2</sub>-MoSe<sub>2</sub> heterostructure for enhanced electrocatalytic hydrogen production, *Journal of Colloid and Interface Science*, 2022, **608**, 922-930.
14. C. M. Yang, L. H. Zhou, C. T. Wang, W. Duan, L. Zhang, F. C. Zhang, J. J. Zhang, Y. Z. Zhen, L. J. Gao and F. Fu, Large-scale synthetic Mo@(2H-1T)-MoSe<sub>2</sub> monolithic electrode for efficient hydrogen evolution in all pH scale ranges and seawater, *Applied Catalysis B: Environmental*, 2022, **304**, 120993.
15. J. B. Huang, Y. Jiang, T. Meng, L. Li and M. H. Cao, Regulating electronic structure and adsorptivity in molybdenum selenide for boosting electrocatalytic water splitting, *Electrochimica Acta*, 2021, **390**, 138888.
16. L. Tan, J. T. Yu, H. Y. Wang, H. T. Gao, X. E. Liu, L. Wang, X. L. She and T. R. Zhan, Controllable synthesis and phase-dependent catalytic performance of dual-phase nickel selenides on Ni foam for overall water splitting, *Applied Catalysis B: Environmental*, 2022, **303**, 120915.

17. H. Wang, J. Ying, Y. X. Xiao, J. B. Chen, J. H. Li, Z. Z. He, H. J. Yang and X. Y. Yang, Ultrafast synthesis of Cu<sub>2</sub>O octahedrons inlaid in Ni foam for efficient alkaline water/seawater electrolysis, *Electrochemistry Communications*, 2022, **134**, 107177.
18. C. Kim, S. Lee, S. H. Kim, J. Park, S. Kim, S. H. Kwon, J. S. Bae, Y. S. Park and Y. Kim, Cobalt–iron–phosphate hydrogen evolution reaction electrocatalyst for solar-driven alkaline seawater electrolyzer, *Nanomaterials*, 2021, **11**, 2989.
19. Y. R. Zhang, C. Y. Fu, J. L. Fan, H. Y. Lv and W. J. Hao, Preparation of Ti@ NiB electrode via electroless plating toward high-efficient alkaline simulated seawater splitting, *Journal of Electroanalytical Chemistry*, 2021, **901**, 115761.
20. K. Jiang, W. J. Liu, W. Lai, M. L. Wang, Q. Li, Z. L. Wang, J. J. Yuan, Y. L. Deng, J. Bao and H. B. Ji, NiFe layered double hydroxide/FeOOH heterostructure nanosheets as an efficient and durable bifunctional electrocatalyst for overall seawater splitting, *Inorganic chemistry*, 2021, **60**, 17371-17378.
21. W. J. Liu, K. Jiang, Y. M. Hu, Q. Li, Y. L. Deng, J. Bao and Y. C. Lei, Zr-doped CoFe-layered double hydroxides for highly efficient seawater electrolysis, *Journal of Colloid and Interface Science*, 2021, **604**, 767-775.
22. A. R. Jadhav, A. Kumar, J. Lee, T. Yang, S. Na, J. Lee, Y. G. Luo, X. H. Liu, Y. Hwang and Y. Liu, Stable complete seawater electrolysis by using interfacial chloride ion blocking layer on catalyst surface, *Journal of Materials Chemistry A*, 2020, **8**, 24501-24514.
23. Y. C. Li, X. Y. Wu, J. P. Wang, H. X. Wei, S. Y. Zhang, S. L. Zhu, Z. Y. Li, S. L. Wu, H. Jiang and Y. Q. Liang, Sandwich structured Ni<sub>3</sub>S<sub>2</sub>-MoS<sub>2</sub>-Ni<sub>3</sub>S<sub>2</sub>@ Ni foam electrode as a stable bifunctional electrocatalyst for highly sustained overall seawater splitting, *Electrochimica Acta*, 2021, **390**, 138833.
24. H. Zhang, S. Y. Geng, M. Ouyang, H. Yadegari, F. Xie and D. J. Riley, A self-reconstructed bifunctional electrocatalyst of pseudo-amorphous nickel carbide@ iron oxide network for seawater splitting, *Advanced Science*, 2022, **9**, 2200146.
25. Y. H. Wu, Z. N. Tian, S. F. Yuan, Z. Y. Qi, Y. R. Feng, Y. F. Wang, R. Huang, Y. L. Zhao, J. H. Sun and W. Zhao, Solar-driven self-powered alkaline seawater electrolysis via multifunctional earth-abundant heterostructures, *Chemical Engineering Journal*, 2021, **411**, 128538.
26. S. Duan, Z. Liu, H. H. Zhuo, T. Y. Wang, J. Y. Liu, L. Wang, J. S. Liang, J. T. Han, Y. H. Huang and Q. Li, Hydrochloric acid corrosion induced bifunctional free-standing NiFe hydroxide nanosheets towards high-performance alkaline seawater splitting, *Nanoscale*, 2020, **12**, 21743-21749.
27. L. Yu, Q. Zhu, S. W. Song, B. McElhenny, D. Z. Wang, C. Z. Wu, Z. J. Qin, J. M. Bao, Y. Yu and S. Chen, Non-noble metal-nitride based electrocatalysts for high-performance alkaline seawater electrolysis, *Nature communications*, 2019, **10**, 5106.
28. J. P. Sun, J. Li, Z. Z. Li, C. H. Li, G. M. Ren, Z. S. Zhang and X. C. Meng, Modulating the electronic structure on cobalt sites by compatible heterojunction fabrication for greatly improved overall water/seawater electrolysis, *ACS Sustainable Chemistry & Engineering*, 2022, **10**, 9980-9990.
29. C. Y. Fu, W. J. Hao, J. L. Fan, Q. Zhang, Y. H. Guo, J. C. Fan, Z. L. Chen and G. S. Li, Fabrication of Ultra-Durable and Flexible NiP<sub>x</sub>-Based Electrode toward High-Efficient Alkaline Seawater Splitting at Industrial Grade Current Density, *Small*, 2023, **19**, 2205689.
30. W. C. Xu, G. L. Fan, S. L. Zhu, Y. Q. Liang, Z. D. Cui, Z. Y. Li, H. Jiang, S. L. Wu and F. Y. Cheng, Electronic structure modulation of nanoporous cobalt phosphide by carbon doping for alkaline hydrogen evolution reaction, *Advanced Functional Materials*, 2021, **31**, 2107333.

31. C. Y. Fu, S. Weng, J. L. Fan, Y. R. Zhang, Y. H. Guo and W. J. Hao, Boron-based materials modified on the surface of TiO<sub>2</sub> nanorods via electroless plating toward high-efficient solar-driven water splitting, *Chemical Engineering Journal*, 2022, **430**, 132881.
32. D. Zhang, H. F. Miao, X. K. Wu, Z. C. Wang, H. Zhao, Y. Shi, X. L. Chen, Z. Y. Xiao, J. P. Lai and L. Wang, Scalable synthesis of ultra-small Ru<sub>2</sub>P@ Ru/CNT for efficient seawater splitting, *Chinese Journal of Catalysis*, 2022, **43**, 1148-1155.
33. F. Nie, Z. Li, X. P. Dai, X. L. Yin, Y. H. Gan, Z. H. Yang, B. Q. Wu, Z. T. Ren, Y. H. Cao and W. Y. Song, Interfacial electronic modulation on heterostructured NiSe@ CoFe LDH nanoarrays for enhancing oxygen evolution reaction and water splitting by facilitating the deprotonation of OH to O, *Chemical Engineering Journal*, 2022, **431**, 134080.
34. D. X. Yao, W. J. Hao, S. Weng, M. L. Hou, W. L. Cen, G. S. Li, Z. L. Chen and Y. T. Li, Local photothermal effect enabling Ni<sub>3</sub>Bi<sub>2</sub>S<sub>2</sub> nanoarray efficient water electrolysis at large current density, *Small*, 2022, **18**, 2106868.
35. H. Y. Wang, J. T. Ren, L. Wang, M. L. Sun, H. M. Yang, X. W. Lv and Z. Y. Yuan, Synergistically enhanced activity and stability of bifunctional nickel phosphide/sulfide heterointerface electrodes for direct alkaline seawater electrolysis, *Journal of Energy Chemistry*, 2022, **75**, 66-73.
36. Q. P. Yu, X. B. Liu, G. S. Liu, X. P. Wang, Z. J. Li, B. Li, Z. X. Wu and L. Wang, Constructing Three-Phase Heterojunction with 1D/3D Hierarchical Structure as Efficient Trifunctional Electrocatalyst in Alkaline Seawater, *Advanced Functional Materials*, 2022, **32**, 2205767.
37. H. J. Chen, Y. H. Zou, J. Li, K. W. Zhang, Y. Z. Xia, B. Hui and D. J. Yang, Wood aerogel-derived sandwich-like layered nanoelectrodes for alkaline overall seawater electrosplitting, *Applied Catalysis B: Environmental*, 2021, **293**, 120215.
38. C. J. Lyu, J. R. Cheng, K. L. Wu, J. W. Wu, N. Wang, Z. L. Guo, P. F. Hu, W. M. Lau and J. L. Zheng, Interfacial electronic structure modulation of CoP nanowires with FeP nanosheets for enhanced hydrogen evolution under alkaline water/seawater electrolytes, *Applied Catalysis B: Environmental*, 2022, **317**, 121799.
39. H. Y. Wang, L. Y. Chen, L. Tan, X. Liu, Y. H. Wen, W. G. Hou and T. R. Zhan, Electrodeposition of NiFe-layered double hydroxide layer on sulfur-modified nickel molybdate nanorods for highly efficient seawater splitting, *Journal of Colloid and Interface Science*, 2022, **613**, 349-358.
40. S. H. Wang, P. Yang, X. F. Sun, H. L. Xing, J. Hu, P. Chen, Z. T. Cui, W. K. Zhu and Z. J. Ma, Synthesis of 3D heterostructure Co-doped Fe<sub>2</sub>P electrocatalyst for overall seawater electrolysis, *Applied Catalysis B: Environmental*, 2021, **297**, 120386.
41. C. L. Chai, J. Y. Yang, C. Jiang, L. Liu and J. Y. Xi, Efficient and Durable Cu<sub>3</sub>P-FeP for Hydrogen Evolution from Seawater with Current Density Exceeding 1 A cm<sup>-2</sup>, *ACS Applied Energy Materials*, 2022, **5**, 2909-2917.
42. L. X. Zhang, H. Wei, H. F. Jiu, C. L. Wang, Y. Q. Qin, S. C. Che, Z. X. Guo and Y. X. Han, Ni<sub>3</sub>N/Co<sub>4</sub>N nanosheet heterojunction electrocatalyst for hydrogen evolution reaction in alkaline fresh water/simulated seawater, *Dalton Transactions*, 2022, **51**, 16733-16739.
43. L. B. Wu, F. H. Zhang, S. W. Song, M. H. Ning, Q. Zhu, J. Q. Zhou, G. H. Gao, Z. Y. Chen, Q. C. Zhou and X. X. Xing, Efficient alkaline water/seawater hydrogen evolution by a nanorod-nanoparticle-structured Ni-MoN catalyst with fast water-dissociation kinetics, *Advanced Materials*, 2022, **34**, 2201774.
44. R. Andaveh, A. S. Rouhaghdam, J. Ai, M. Maleki, K. Wang, A. Seif, G. B. Darband and J. Y. Li, Boosting the electrocatalytic activity of NiSe by introducing MnCo as an

- efficient heterostructured electrocatalyst for large-current-density alkaline seawater splitting, *Applied Catalysis B: Environmental*, 2023, **325**, 122355.
45. P. K. L. Tran, D. T. Tran, D. Malhotra, S. Prabhakaran, D. H. Kim, N. H. Kim and J. H. Lee, Highly effective freshwater and seawater electrolysis enabled by atomic Rh-modulated Co-CoO lateral heterostructures, *Small*, 2021, **17**, 2103826.
  46. B. R. Wang, M. J. Lu, D. Chen, Q. Zhang, W. W. Wang, Y. T. Kang, Z. X. Fang, G. S. Pang and S. H. Feng, Ni<sub>x</sub>Fe<sub>y</sub>N@C microsheet arrays on Ni foam as an efficient and durable electrocatalyst for electrolytic splitting of alkaline seawater, *Journal of Materials Chemistry A*, 2021, **9**, 13562-13569.
  47. H. Y. Jin, X. S. Wang, C. Tang, A. Vasileff, L. Q. Li, A. Slattery and S. Z. Qiao, Stable and highly efficient hydrogen evolution from seawater enabled by an unsaturated nickel surface nitride, *Advanced Materials*, 2021, **33**, 2007508.
  48. S. Li, Z. Y. Zhao, T. Ma, P. Pachfule and A. Thomas, Superstructures of Organic-Polyoxometalate Co-crystals as Precursors for Hydrogen Evolution Electrocatalysts, *Angewandte Chemie International Edition*, 2022, **61**, e202112298.
  49. X. K. Wang, X. K. Zhou, C. Li, H. X. Yao, C. H. Zhang, J. Zhou, R. Xu, L. Chu, H. L. Wang and M. Gu, Asymmetric Co-N<sub>3</sub>P<sub>1</sub> Trifunctional Catalyst with Tailored Electronic Structures Enabling Boosted Activities and Corrosion Resistance in an Uninterrupted Seawater Splitting System, *Advanced Materials*, 2022, **34**, 2204021.
  50. T. Marimuthu, R. Yuvakkumar, P. S. Kumar, G. Ravi, X. Xu, D. Velauthapillai and N. V. Dai Viet, Cost effective and facile low temperature hydrothermal fabrication of Cu<sub>2</sub>S thin films for hydrogen evolution reaction in seawater splitting, *International Journal of Hydrogen Energy*, 2022, **47**, 30819-30829.
  51. W. J. Zang, T. Sun, T. Yang, S. B. Xi, M. Waqar, Z. K. Kou, Z. Y. Lyu, Y. P. Feng, J. Wang and S. J. Pennycook, Efficient hydrogen evolution of oxidized Ni-N<sub>3</sub> defective sites for alkaline freshwater and seawater electrolysis, *Advanced Materials*, 2021, **33**, 2003846.
  52. Y. Z. Luo, P. Wang, G. X. Zhang, S. S. Wu, Z. S. Chen, H. Ranganathan, S. H. Sun and Z. C. Shi, Mn-doped nickel-iron phosphide heterointerface nanoflowers for efficient alkaline freshwater/seawater splitting at high current densities, *Chemical Engineering Journal*, 2023, **454**, 140061.
  53. T. Marimuthu, R. Yuvakkumar, G. Ravi, X. Q. Xu, G. Xu and D. Velauthapillai, Hydrothermal construction of flower-like CuS microsphere electrocatalysts for hydrogen evolution reactions in alkaline fresh water, alkaline seawater, and seawater, *International Journal of Energy Research*, 2022, **46**, 19723-19736.
  54. L. B. Wu, L. Yu, F. H. Zhang, B. McElhenny, D. Luo, A. Karim, S. Chen and Z. F. Ren, Heterogeneous bimetallic phosphide Ni<sub>2</sub>P-Fe<sub>2</sub>P as an efficient bifunctional catalyst for water/seawater splitting, *Advanced Functional Materials*, 2021, **31**, 2006484.
  55. H. H. Chen, S. S. Zhang, Q. Liu, P. Yu, J. Luo, G. Z. Hu and X. J. Liu, CoSe<sub>2</sub> nanocrystals embedded into carbon framework as efficient bifunctional catalyst for alkaline seawater splitting, *Inorganic Chemistry Communications*, 2022, **146**, 110170.
